# Supplementary material
Source: Springer Nature journal article supplement (https://www.springermedizin.de/resource/supplementary/13058_2009_2529_MOESM1_ESM.pdf/9701616)
Supplement: MOESM1 [file 9701616]

Post-menopausal women with endocrine-responsive breast cancer  
n=213

Measurement of LS and HP BMD by DEXA  
Classification of groups

**Low risk**  
T  $\geq$ -1 treated with A  
n=50

**Moderate risk**  
T <-1 but >-2  
randomized

**High risk**  
T  $\leq$ -2 treated with A+R  
n=93

Treated with A only  
n=33

Treated with A+R  
n=37

1 No baseline measurement

1 Death

Assessment of BMD at 12 and 24 months

n=36  
n=35

n=25  
n=21

**12 months**  
**24 months**

n=32  
n=26

n=65  
n=50

1 Withdraw consent  
1 Dis. Recurrence  
4 Lost to F/up  
7 Missing

1 Adverse event  
1 Withdraw consent  
1 Dis. Recurrence  
1 Lost to F/up  
3 Missing

1 Dis. Recurrence  
4 Missing

2 Adverse events  
1 Withdraw consent  
2 Invest. Decision  
3 Dis. Recurrences  
3 Deaths  
4 Lost to F/up  
13 Missing

1 Withdraw consent

1 Withdraw consent  
1 Dis. Recurrence  
1 Lost to F/up  
1 Missing

1 Adverse event  
1 Lost to F/up  
4 Missing

3 Adverse events  
1 Dis. Recurrence  
6 Lost to F/up  
5 Missing
